# Supplementary material
Source: ML conference proceedings conference paper supplement (https://openreview.net/forum?id=ec7BWId59zF)
Supplement: supplementary_material [file attachment]

---

# Supplementary information

---

**Akshay V. Jagadeesh**  
Department of Psychology  
Wu Tsai Neurosciences Institute  
Stanford University  
akshayj@stanford.edu

**Justin L. Gardner**  
Department of Psychology  
Wu Tsai Neurosciences Institute  
Stanford University  
jlg@stanford.edu

## 1 Supplementary Figures

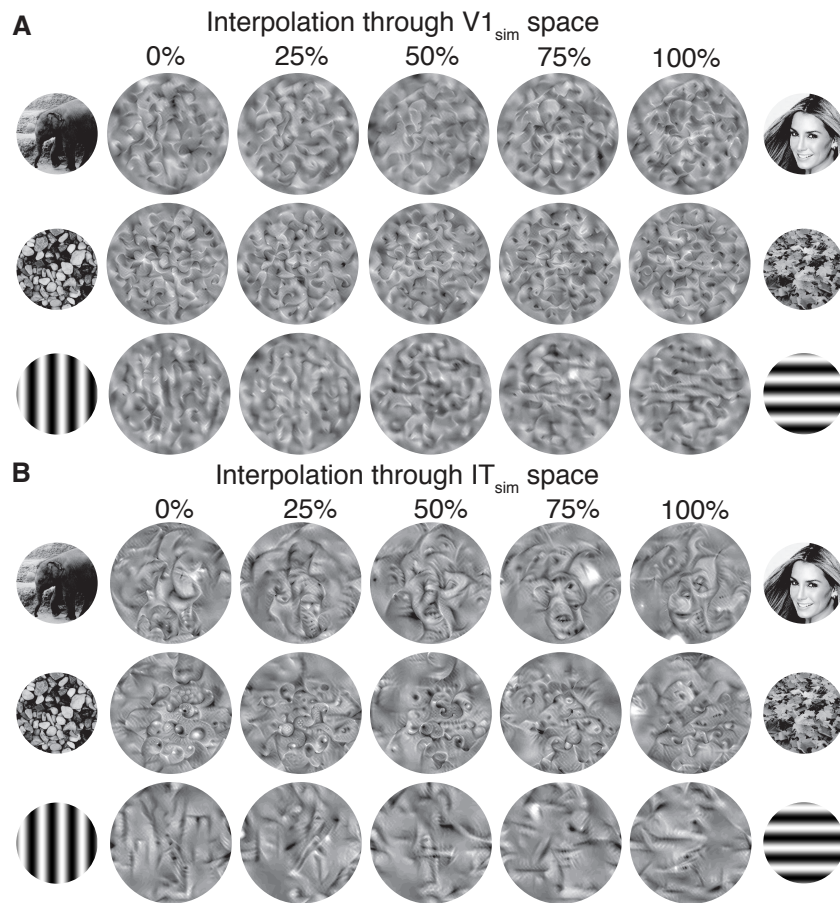

Figure 1: Example stimuli synthesized to linearly interpolate through neural representational spaces. (A) Images labeled  $V1$  metamers are synthesized to evoke an identical  $V1_{sim}$  response to the natural images besides them. Then, by linearly interpolating between the  $V1_{sim}$  response to two different images at 3 different intervals (25%, 50% and 75%), we can synthesize images interpolate through this arbitrary dimension of  $V1$  space. (B) Same as (A) but for  $IT_{sim}$  representational space.
